# Supplementary material
Source: PubMed Central journal article supplement (PMC3350364)

## SUPPLEMENTAL FIGURE LEGENDS

**Figure S1.** B cell development in the bone marrow. Bone marrow cells from WT, WKO, and cDKO mice were labeled with B220, CD43, IgM and, IgD, and developmental stages defined according to Hardy's classification (Fr D, E, and F, upper panel). Lower panel shows averages  $\pm$  SD of combined data from three experiments.

**Figure S2.** LFA-1 expression on splenic B cells. Flow cytometric analysis (A) to determine expression of LFA-1 as mean fluorescent intensity on T1, FO, T2-MZP, and MZ B cells in (B) WT, cNWKO, WKO, and cDKO mice. Each group represents averages  $\pm$  SD from six mice. \*,  $P < 0.05$  as compared with WT.

**Figure S3.** Characterization of transitional B cells in the spleen. Flow cytometric analysis (A) to define T1, T2, and T3 cells in (B) absolute number, and (C) relative number of cells. Each group represents averages  $\pm$  SD from six mice. \*,  $P < 0.05$  as compared with WT.

**Figure S4.** Proliferation of B cells *in vivo*. Mice were fed BrdU in the drinking water for 6 days. (A) The proportion of BrdU+ T1, FO, T2-MZP, and MZ B cells was determined in (B) WT, cNWKO, WKO, and cDKO mice. Each group represents averages  $\pm$  SD from six mice. \*,  $P < 0.05$  as compared with WT.

**Figure S5.** Apoptosis of cultured B cells. Spleen B cells were stimulated with indicated stimulus for 72 hours. Percentage of apoptotic cells was assessed after labeling with 7AAD and AnnexinV and flow cytometric analysis. Upper panel shows 7AAD and AnnexinV staining of LPS stimulated B cells. Apoptotic cells were defined as AnnexinV<sup>high</sup>7AAD<sup>lo</sup> cells. Lower panel shows one graph representative of two similar experiments.

Figure S1

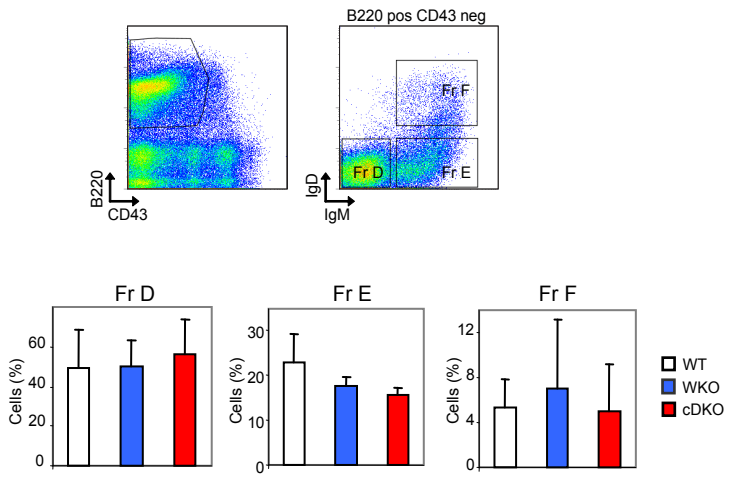

Figure S2

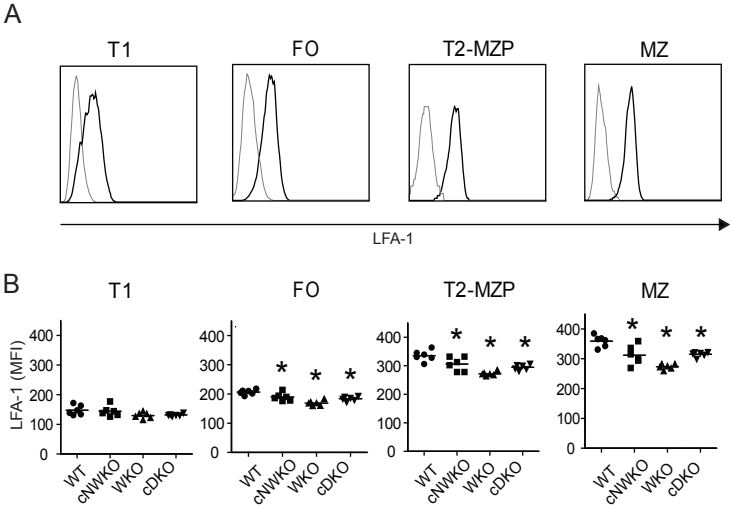

Figure S3

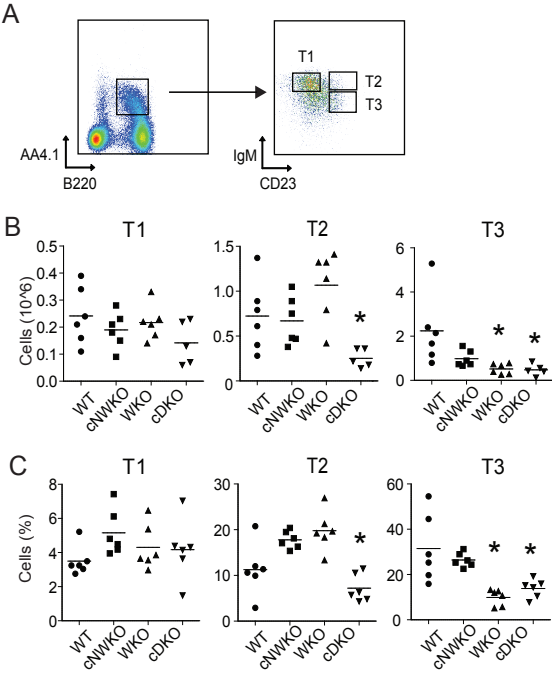

Figure S4

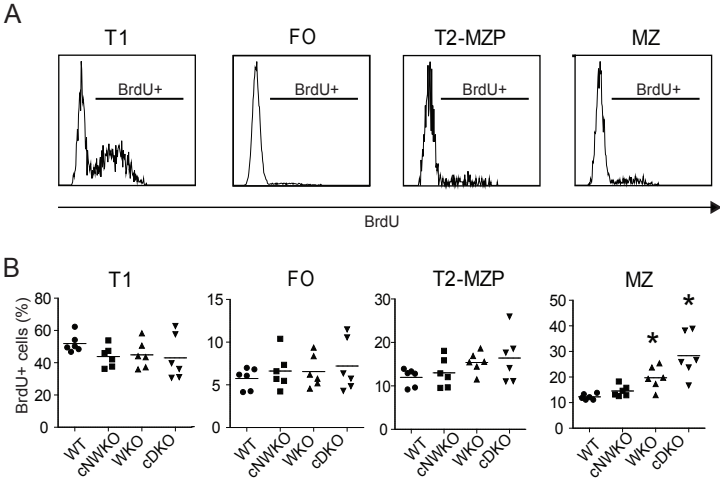

Figure S5

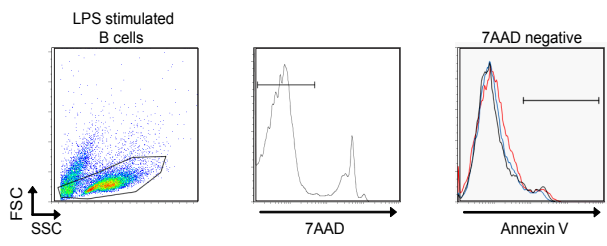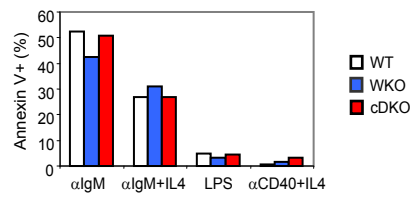

Supplement: supp_blood-2010-09-308197_blood-2010-09-308197-1.pdf [file supp_blood-2010-09-308197_blood-2010-09-308197-1.pdf]
